1 **Association between physical multimorbidity and common mental health disorders in rural and**  
2 **urban Malawian settings: preliminary findings from Healthy Lives Malawi long-term conditions**  
3 **survey**

4 Owen Nkoka<sup>1,2</sup>, Shekinah Munthali-Mkandawire<sup>1</sup>, Kondwani Mwandira<sup>1</sup>, Providence Nindi<sup>1</sup>, Albert  
5 Dube<sup>1</sup>, Innocent Nyanjagha<sup>1</sup>, Angella Mainjeni<sup>1</sup>, Jullita Malava<sup>1</sup>, Abena S Amoah<sup>1,3,4</sup>, Estelle  
6 McLean<sup>1,3</sup>, Robert Stewart<sup>1,5</sup>, Amelia C Crampin<sup>1,2,3</sup>, Alison J Price<sup>1,3</sup>

7 <sup>1</sup>Malawi Epidemiology and Intervention Research Unit, Lilongwe, Malawi; <sup>2</sup>School of Health and  
8 Wellbeing, University of Glasgow, Glasgow, UK; <sup>3</sup>London School of Hygiene and Tropical Medicine,  
9 Department of Population Health, London, UK; Department of Parasitology, <sup>4</sup>Leiden University  
10 Medical Centre, The Netherlands, <sup>5</sup>Division of Psychiatry in the College of Medicine and Veterinary  
11 Medicine at the University of Edinburgh

12

13

14

15 Target Journal: PloS Global Public Health (Multimorbidity in Africa Collection)

**NOTE: This preprint reports new research that has not been certified by peer review and should not be used to guide clinical practice.**

17 **Abstract**

18 In low-income Africa, the epidemiology of physical multimorbidity and associated mental health  
19 conditions is not well described. We investigated the multimorbidity burden, disease combinations,  
20 and relationship between physical multimorbidity and common mental health disorders in rural and  
21 urban Malawi using early data from 9,849 adults recruited to an on-going large cross-sectional study  
22 on long-term conditions, initiated in 2021. Multimorbidity was defined as having two or more  
23 measured (diabetes, hypertension) or self-reported (diabetes, hypertension, disability, chronic pain,  
24 HIV, asthma, stroke, heart disease, and epilepsy). Depression and anxiety symptoms were scored using  
25 the 9-item Patient Health Questionnaire and 7-item General Anxiety Disorder scale and defined by the  
26 total score (range 0–27 and 0–21, respectively). We determined age-standardized multimorbidity  
27 prevalence and condition combinations. Additionally, we used multiple linear regression models to  
28 examine the association between physical multimorbidity and depression and anxiety symptom  
29 scores. Of participants, 81% were rural dwelling, 56% were female, and the median age was 30 years  
30 (IQR 21–43). The age-standardized urban and rural prevalence of multimorbidity was 14.1% (95% CI,  
31 12.5–15.8%) and 12.2% (95% CI, 11.6–12.9%), respectively. In adults with two conditions,  
32 hypertension, and disability (18%) co-occurred most frequently, and in those with three conditions,  
33 hypertension, disability, and chronic pain (23%) were the most common combination. Compared to  
34 adults without physical conditions, having one (*B*-Coefficient (*B*) 0.78; 95% CI 0.63–0.95%), two- (*B*  
35 1.36; 95% CI 1.14–1.58%), and three- or more- physical conditions (*B* 2.23; 95% CI 1.87–2.59%) were  
36 associated with increasing depression score, *p*-trend <0.001. A comparable ‘dose-response’  
37 relationship was observed between physical multimorbidity and anxiety symptom scores. While the  
38 direction of observed associations cannot be determined with these cross-sectional data, our findings  
39 highlight the burden of multimorbidity and need for integrating mental and physical health service  
40 delivery in Malawi.

41 **Keywords:** Multimorbidity, mental health, depression, anxiety, Malawi

## 42 Introduction

43 In low- and middle-income countries (LMIC), population life expectancy has improved in recent  
44 decades, with a 12 year increase in life expectancy at birth observed between 1990 and 2015 [1, 2] .  
45 Improved access to healthcare and other improvements in living standards have contributed to an  
46 increase in life expectancy in some LMIC [3, 4]. In LMIC of Africa with generalised HIV-infection  
47 epidemics, the widespread availability of free, at point of care, highly effective antiretroviral  
48 medication for HIV infection has played a crucial role [5]. This medication has significantly prolonged  
49 the lives of individuals living with HIV, with adults surviving to experience other health conditions that  
50 may also be exacerbated by long-term treated HIV, such as dyslipidaemia, hypertension and diabetes  
51 [6]. As such, the burden of people living with multiple long-term health conditions is increasing, with  
52 implications for individual wellbeing and wider societal and economic impacts [7].

53 Multimorbidity (MM), defined as the presence of two or more long-term conditions, is a concern for  
54 healthcare systems worldwide [8, 9]. Recent multimorbidity data from LMIC show prevalence  
55 estimates as high as 60% [10] with burden evident in young adults (<25 years)[11-13], which contrasts  
56 to earlier findings that observed the bulk of burden in older adults (≥65 years) [14]. Observed variation  
57 in multimorbidity prevalence estimates in different populations [15] highlights the need for country-  
58 specific studies to determine the distinct socioeconomic and lifestyle factors that influence burden  
59 [16] and to identify high-risk and vulnerable groups.

60 Mental health disorders are an emerging health burden in LMICs, accounting for 80% of people with  
61 mental health conditions worldwide [17]. However, 90% of individuals with mental health disorders  
62 in LMIC do not have access to mental health services [18-20]. This treatment gap is further  
63 exacerbated by inequalities in accessing mental health services between rural and urban residents  
64 [21]. Previous studies in LMIC have reported links between mental health disorders and  
65 multimorbidity. In rural and urban India, compared to those with one or no health conditions,

66 multimorbid individuals exhibited a higher risk of depressive symptoms measured using the Centre  
67 for Epidemiologic Studies Depression Scale (CES-D) [22].

68 In Malawi, a low-income, high HIV prevalence (8.9%)[23] African country, the primary healthcare  
69 system is under-resourced and based largely on a single-disease delivery paradigm [24] despite a rising  
70 burden of non-communicable diseases (NCDs) – including hypertension, diabetes and chronic  
71 respiratory conditions [25, 26]. Furthermore, several facility-based studies in Malawi have reported a  
72 high burden of mental health disorders [27, 28]. Nonetheless, most mental health conditions remain  
73 under diagnosed in the community due to limited availability of mental health services in primary  
74 care, and a lack of mental health funding and trained mental health professionals [29].

75 The relationship between multimorbidity and mental health disorders may be biological as well as  
76 social. For example, elevated inflammatory markers and stress, have been found to be associated with  
77 an increased risk of developing depression [30, 31] as well as with physical long-term conditions [32].  
78 Epidemiological studies have also established links between depression, anxiety, and cardiovascular  
79 diseases [33-35].

80 In LMIC, there is some evidence of the impact of individual physical health conditions on mental health  
81 [36-38] yet, few studies have investigated the relationship between multiple physical health  
82 conditions and depression and anxiety. A population-based study in South Africa reported no  
83 significant association of hypertension alone with depression and anxiety, but revealed a significant  
84 association between the co-morbidity of hypertension and another chronic physical condition and  
85 anxiety [39]. A better understanding of this complex relationship is needed to provide holistic patient  
86 care and to develop effective interventions for the prevention of these conditions.

87 In this study, we investigated the burden and common combinations of multiple health conditions,  
88 and the association between physical multimorbidity and common mental health disorders using early  
89 data from an ongoing population based cross-sectional study of long-term conditions in adolescents  
90 and adults being conducted in rural and urban Malawi between 2021 and 2024.

## 91 **Methods**

### 92 Study design

93 Our long-term conditions study in rural and urban Malawi is an ongoing cross-sectional survey  
94 gathering information on burden of conditions and their risk factors, along with anthropometric and  
95 biological measurements. We aim to recruit 50,000 adolescents (15+ years) and adults who are  
96 resident in rural and urban health and demographic surveillance systems (HDSS), which operate as  
97 open-cohorts. The survey is one component of a wider “Healthy Lives Malawi” research platform,  
98 investigating long-term health conditions using population-level data from the rural and urban HDSS.

### 99 Study setting

100 The rural Karonga HDSS was started in 2002 and currently captures information on the births, deaths  
101 and movements of approximately 53,000 people covering an area of 140km<sup>2</sup> [40]. It is situated in the  
102 northern part of Malawi, in Karonga district, with a predominantly subsistence economy [40]. The  
103 Lilongwe HDSS (urban) covers an area of 6.68 km<sup>2</sup> and is nested within Area-25, a high-density area  
104 located in the west of Lilongwe city that borders ‘Kanengo’, an industrial location including tobacco  
105 auction floors. Baseline recruitment for the Lilongwe HDSS started in August 2022. At the time of  
106 analysis, over 7,000 of the 65,000 people targeted by the Lilongwe HDSS have been recruited and are  
107 being followed. The population includes people working in public and private sectors, including many  
108 seasonal tobacco workers due to the location’s proximity to the Kanengo industrial area [41].

### 109 Study population

110 Individuals who are aged 15 years and above and who are usual members/residents of households (in  
111 the rural or urban HDSS) are eligible for recruitment.

### 112 Data collection

113 Our ongoing data collection is interviewer-led using electronic data capture with Open Data Kit  
114 software [42]. Questions are read to each participant in the language of their choice. Most interviews

115 in Karonga are conducted in Chitumbuka, those in Lilongwe mostly in Chichewa. All field workers were  
116 trained using standard operating procedures, including obtaining informed, written (or thumbprint)  
117 consent from participants, biomeasures and venepuncture. A pre-test of the survey tool and study  
118 procedures was carried out from July 26 to August 06, 2021 (in rural site Karonga) and from July 18 to  
119 July 29, 2022 (in urban site Lilongwe). Data collection in Karonga commenced in October 2021, and  
120 Lilongwe in September 2022.

## 121 Measures

### 122 Main outcomes

123 *Depression:* To evaluate symptoms of depression, the Patient Health Questionnaire (PHQ)-9 was  
124 employed to evaluate symptoms of depression [43]. The PHQ9 is a survey measure that includes items  
125 that enquire about the presence symptoms of Diagnostic and Statistical Manual of Mental Disorders  
126 (DSM) depressive disorder in the previous two weeks. Each item is scored from '0' (not at all), "1"  
127 (sometimes), "2" (usually), and "3" (almost always). The PHQ-9 scores range from 0 to 27, with higher  
128 scores corresponding to more symptoms and increasing severity of depression [44].

129 *Anxiety:* Data on anxiety symptoms were gathered using the General Anxiety Disorder (GAD)-7 scale  
130 [45]. The GAD-7 is a seven-item survey measure that assesses for symptoms of DSM generalized  
131 anxiety disorder in previous two weeks. Each item receives a score of "0" (not at all), "1" (sometimes),  
132 "2" (usually), and "3" (almost always). The GAD-7 scale has a score range of 0 to 21, with higher values  
133 indicating more symptoms and more severe anxiety [45].

134 Chichewa and Chitumbuka versions of the PHQ9 and GAD7 were developed through a rigorous  
135 process of translation, adaptation, and piloting, and validated against clinical interviews.

### 136 Main independent variable

137 Physical health multimorbidity was defined as the presence of two or more long-term conditions.  
138 These included a self-report of previously clinician-diagnosed conditions such as heart disease,

139 asthma, epilepsy, stroke, and HIV. A question ‘have you ever been diagnosed with [*name of condition*]  
140 by a doctor or other health professionals’ was asked for each of the conditions to obtain self-reported  
141 medical history of the participants. The Washington Group short set of questions on disability's six  
142 functional domains—difficulty seeing even with glasses, difficulty hearing even with a hearing aid,  
143 difficulty walking or climbing stairs, difficulty remembering or concentrating, difficulty washing oneself  
144 thoroughly or dressing—were used to capture disability [46]. Disability was defined as the inability to  
145 perform any of the six disability domains indicated by responses "a lot of difficulty" or "can't do at all."  
146 Participants who reported having any pain for more than three months were categorised as having  
147 chronic pain [47] with information on location also collected. Diabetes was defined as fasting blood  
148 glucose of  $\geq 7.0$  mmol/L or self-report of a prior diagnosis of diabetes by a health professional. A  
149 systolic blood pressure of  $\geq 140$  mm Hg, a diastolic blood pressure of  $\geq 90$  mm Hg, or self-reporting of  
150 current antihypertensive drug use or prior diagnosis were all used to define hypertension. Individuals  
151 with incomplete data for whom it was not possible to determine if they had at least 2 conditions, only  
152 1 or no conditions, were excluded from the multimorbidity definition.

### 153 Covariates

154 Covariates included: site (Lilongwe (urban), Karonga (rural)); age in years (15-17, 18-29, 30-39, 40-49,  
155 50-59, and  $\geq 60$ ); sex (male vs female); education attainment (not completed any level, primary, junior  
156 secondary, senior secondary, and postsecondary education); employment (not employed, full-time  
157 student, regular employment, and self/irregular employment); and marital status (never married,  
158 married, divorced/separated, and widowed). We also considered several lifestyle and other health-  
159 related factors such as smoking status (never smoked, current [smoked in the last 6 months], and  
160 former [stopped more than 6 months ago]); alcohol consumption in the past one year (yes/no); being  
161 physically active as defined by report of activities that strengthen muscle at least 3 days per week (for  
162 those aged 15-17 years) and at least 2 days per week (among those aged  $\geq 18$  years) [48]; and body  
163 mass index (BMI) measured as weight in kilograms by height in meters squared ( $\text{kg}/\text{m}^2$ ) based on WHO

164 conventional classification and categorized into four groups (underweight < 18.5, normal 18.5–24.9,  
165 overweight 25.0–29.9 kg/m<sup>2</sup> and obesity ≥30.0 kg/m<sup>2</sup>) [49].

166 Data analysis

167 We performed univariate and bivariate analyses (using one-way analysis of variance (ANOVA) or t-  
168 tests, as appropriate) to describe the main variables and the relationship between selected factors  
169 and depressive and anxiety symptoms as well as multimorbidity status. To account for multiple testing,  
170 we also performed a Bonferroni test on associations for which the ANOVA p value was < 0.05. Age-  
171 standardized prevalence of the physical and mental conditions considered in the current analysis and  
172 the mental health measures were calculated using WHO standard population[50] to allow meaningful  
173 comparison with external populations.

174 To investigate the association between physical multimorbidity and depressive and anxiety symptoms,  
175 we applied multiple linear regression models without accounting for clustering of individuals from the  
176 same households (as interclass correlation coefficients (ICC) of responses for participants from the  
177 same household in relation to depressive and anxiety symptoms were low (ICC 0.14 and 0.09,  
178 respectively)). We tested for trend to determine whether there was a ‘dose-response’ relationship  
179 between increasing number of physical conditions and depression and anxiety scores [51, 52].

180 We investigated the extent to which the association between physical health and multimorbidity  
181 varied by key sociodemographic factors (sex, site, and age), by adding an interaction term to the  
182 regression model one at a time. We further conducted stratified analyses for variables with significant  
183 interactions ( $p < 0.05$ ) as this signalled potential moderation effects.

184 We used  $\chi^2$ , t-tests and ANOVA to compare the sociodemographic characteristics (sex, age,  
185 educational level, employment) and the outcome measures in the individuals that were omitted from  
186 the analysis due to incomplete data on multimorbidity status to those with complete data to check  
187 whether there were any significant differences.



188 All analyses were performed using Stata version 17.0 (Stata Corp LP, College Station, TX, USA), and a  
189 2-tailed  $p$ -value  $< 0.05$  was considered significant.

## 190 Ethical Considerations

191 The Healthy Lives Malawi long-term conditions survey protocol was reviewed and approved by the  
192 Malawi National Health Sciences Research Committee (approval #2642) and the University of  
193 Glasgow's College of Medical, Veterinary and Life Sciences Ethics Committee (project #200200057).  
194 Written informed consent for the survey was obtained from each respondent at the start of each  
195 interview. For participants aged between under 18 years, written informed consent from their legally  
196 acceptable representative (parent/guardian) was obtained in addition to their assent to take part in  
197 the study, unless they were regarded as emancipated minors (i.e., living independently from their legal  
198 guardians).

## 199 Results

### 200 *Sample Characteristics*

201 Of the 10,011 individuals approached between 19 Oct 2021 and 28 April 2023 (8,011 and 2,000 in  
202 Karonga and Lilongwe, respectively), 9,849 individuals were recruited representing a 98% response  
203 rate (7,930 and 1,919 from Karonga and Lilongwe, respectively). Table 1 lists the demographic and  
204 health-related characteristics of the study population by sex and site. Overall, 56% of the participants  
205 were female. The overall median age of the total population was 30.0 years (IQR, 21.0 – 43.0). The  
206 mean age was higher among women than men in the total population  $34.9 \pm 16.4$  vs  $33.2 \pm 16.2$  years,  
207  $p < 0.001$ , and in the rural population ( $35.6 \pm 16.9$  vs  $33.6 \pm 16.8$ )  $p < 0.001$ . Of the participants, 51% had  
208 not completed any formal education, and 50% were self-employed or had irregular employment. In  
209 terms of lifestyle factors, a majority (92%) reported to have never smoked, and 19% had not consumed  
210 alcohol in the past 12 months. Among the participants, 17% met criterion for being physically active,  
211 most (67%) had normal weight while 25% were overweight/obese with women having the highest

212 prevalence, at 33% (Table 1). We excluded 11% (1,095 participants) from the main analysis because  
213 they had missing data on multimorbidity.

214 Table 1 Characteristics of participants in rural and urban sites

| Variable                             | Total (n=9849)     |                    |                  | Karonga (rural, n=7930) |                    | Lilongwe (urban, n=1919) |                    |
|--------------------------------------|--------------------|--------------------|------------------|-------------------------|--------------------|--------------------------|--------------------|
|                                      | All (n=9849)       | Men (n=4287)       | Women (n=5562)   | Men (n=3501)            | Women (4429)       | Men (n=786)              | Women (n=1133)     |
| <b>Sociodemographic factors</b>      |                    |                    |                  |                         |                    |                          |                    |
| Median age, IQR                      | 30.0 (21.0 – 43.0) | 28.0 (20.0 – 43.0) | 31 (22.0 – 44.0) | 28.0 (20.0 – 44.0)      | 32.0 (22.0 – 45.0) | 27.0 (21.0 – 39.0)       | 29.0 (22.0 – 39.0) |
| Mean age, SD (in years) <sup>a</sup> | 34.1 (16.3)        | 33.2 (16.4)        | 34.9 (16.2)      | 33.6 (16.8)             | 35.6 (16.9)        | 31.3 (14.1)              | 32.0 (12.8)        |
| Age group (years)                    |                    |                    |                  |                         |                    |                          |                    |
| 15 – 17                              | 1142 (12%)         | 590 (14%)          | 552 (10%)        | 505 (14%)               | 459 (10%)          | 85 (11%)                 | 93 (8%)            |
| 18 – 29                              | 3743 (38%)         | 1708 (40%)         | 2035 (37%)       | 1328 (38%)              | 1549 (35%)         | 380 (48%)                | 486 (43%)          |
| 30 – 39                              | 1906 (19%)         | 720 (17%)          | 1186 (21%)       | 581 (17%)               | 910 (21%)          | 139 (18%)                | 276 (24%)          |
| 40 – 49                              | 1383 (14%)         | 569 (13%)          | 814 (15%)        | 484 (14%)               | 651 (15%)          | 85 (11%)                 | 163 (14%)          |
| 50 – 59                              | 782 (8%)           | 345 (8%)           | 437 (8%)         | 288 (8%)                | 363 (8%)           | 57 (7%)                  | 74 (7%)            |
| ≥60                                  | 893 (9%)           | 355 (8%)           | 538 (10%)        | 315 (9%)                | 497 (11%)          | 40 (5%)                  | 41 (4%)            |
| Education attainment                 |                    |                    |                  |                         |                    |                          |                    |
| Not completed any level              | 5024 (51%)         | 1887 (44%)         | 3137 (56%)       | 1722 (49%)              | 2777 (63%)         | 165 (21%)                | 360 (32%)          |
| Primary                              | 1604 (16%)         | 745 (17%)          | 859 (15%)        | 601 (17%)               | 645 (15%)          | 144 (18%)                | 214 (19%)          |
| Junior secondary                     | 1342 (14%)         | 616 (14%)          | 726 (13%)        | 494 (14%)               | 500 (11%)          | 122 (16%)                | 226 (20%)          |
| Senior secondary                     | 1175 (12%)         | 693 (16%)          | 482 (9%)         | 484 (13%)               | 295 (7%)           | 209 (27%)                | 187 (17%)          |
| Post secondary                       | 539 (5%)           | 303 (7%)           | 233 (4%)         | 172 (5%)                | 117 (7%)           | 134 (17%)                | 116 (10%)          |
| Missing                              | 165 (2%)           | 40 (1%)            | 125 (2%)         | 28 (1%)                 | 95 (2%)            | 12 (2%)                  | 30 (3%)            |
| Marital status                       |                    |                    |                  |                         |                    |                          |                    |
| Never married                        | 2942 (30%)         | 1790 (42%)         | 1152 (21%)       | 1373 (39%)              | 851 (19%)          | 417 (53%)                | 301 (27%)          |
| Married                              | 5431 (55%)         | 2246 (52%)         | 3185 (57%)       | 1914 (55%)              | 2527 (57%)         | 332 (42%)                | 658 (58%)          |
| Divorced/separated                   | 902 (9%)           | 207 (5%)           | 695 (13%)        | 179 (5%)                | 584 (13%)          | 28 (4%)                  | 111 (10%)          |
| Widowed                              | 574 (6%)           | 44 (1%)            | 530 (10%)        | 35 (1%)                 | 467 (11%)          | 9 (1%)                   | 63 (6%)            |
| Employment                           |                    |                    |                  |                         |                    |                          |                    |
| Not employed                         | 2696 (27%)         | 741 (17%)          | 1955 (35%)       | 575 (16%)               | 1470 (33%)         | 166 (21%)                | 485 (43%)          |
| Full-time student                    | 1486 (15%)         | 817 (19%)          | 669 (12%)        | 661 (19%)               | 506 (11%)          | 156 (20%)                | 163 (14%)          |
| Employed/regular                     | 704 (7%)           | 448 (11%)          | 256 (5%)         | 263 (8%)                | 146 (3%)           | 185 (24%)                | 110 (10%)          |
| Self/irregular                       | 4963 (50%)         | 2281 (53%)         | 2682 (48%)       | 2002 (57%)              | 2307 (52%)         | 279 (36%)                | 375 (33%)          |
| <b>Health-related factors</b>        |                    |                    |                  |                         |                    |                          |                    |
| Smoking status                       |                    |                    |                  |                         |                    |                          |                    |
| Never                                | 9097 (92%)         | 3561 (81%)         | 5536 (99%)       | 2907 (83%)              | 4416 (99%)         | 654 (83%)                | 1120 (99%)         |

|                                                   |                             |            |            |            |            |            |           |            |
|---------------------------------------------------|-----------------------------|------------|------------|------------|------------|------------|-----------|------------|
|                                                   | Former                      | 314 (3%)   | 297 (7%)   | 17 (<1%)   | 228 (7%)   | 7 (<1%)    | 69 (9%)   | 10 (<1%)   |
|                                                   | Current                     | 438 (5%)   | 429 (10%)  | 9 (<1%)    | 366 (10%)  | 6 (<1%)    | 63 (8%)   | 2 (<1%)    |
| Alcohol consumption                               |                             |            |            |            |            |            |           |            |
|                                                   | Not in last year            | 8018 (81%) | 2680 (63%) | 5338 (96%) | 2164 (62%) | 4265 (96%) | 516 (66%) | 1073 (95%) |
|                                                   | In last year                | 1827 (19%) | 1604 (37%) | 223 (4%)   | 1337 (38%) | 164 (4%)   | 267 (34%) | 59 (5%)    |
|                                                   | Missing                     | 4 (<1%)    | 3 (<1%)    | 1 (<1%)    | -          | -          | 3 (<1%)   | 1(<15)     |
| Physical activity                                 |                             |            |            |            |            |            |           |            |
|                                                   | Not met strength guidelines | 8052 (82%) | 3005 (70%) | 5047 (91%) | 2486 (71%) | 4026 (91%) | 519 (66%) | 1021 (90%) |
|                                                   | Met strength guidelines     | 1660 (17%) | 1196 (28%) | 464 (8%)   | 936 (27%)  | 355 (8%)   | 260 (33%) | 109 (10%)  |
|                                                   | Missing                     | 137 (1%)   | 86 (2%)    | 51 (1%)    | 79 (2%)    | 48 (1%)    | 7 (<1%)   | 3 (<1%)    |
| Body mass index (kg/m <sup>2</sup> )              |                             |            |            |            |            |            |           |            |
|                                                   | Underweight                 | 692 (7%)   | 426 (10%)  | 226 (5%)   | 358 (10%)  | 213 (5%)   | 68 (9%)   | 53 (5%)    |
|                                                   | Normal                      | 6614 (67%) | 3338 (78%) | 3276 (59%) | 2752 (79%) | 2680 (61%) | 586 (75%) | 596 (53%)  |
|                                                   | Overweight                  | 1646 (17%) | 396 (9%)   | 1250 (22%) | 299 (9%)   | 995 (22%)  | 97 (12%)  | 255 (23%)  |
|                                                   | Obese                       | 820 (8%)   | 98 (9%)    | 722 (13%)  | 68 (2%)    | 505 (11%)  | 30 (4%)   | 217 (19%)  |
|                                                   | Missing                     | 77 (<1%)   | 29 (<1%)   | 48 (<1%)   | 24 (<1%)   | 36 (<1%)   | 5 (<1%)   | 12 (1%)    |
| Number of physical health conditions <sup>b</sup> |                             |            |            |            |            |            |           |            |
|                                                   | None                        | 5657 (57%) | 2637 (62%) | 3020 (54%) | 2169 (62%) | 2423 (55%) | 468 (60%) | 597 (53%)  |
|                                                   | One                         | 1865 (19%) | 679 (16%)  | 1186 (21%) | 579 (17%)  | 979 (22%)  | 100 (13%) | 207 (18%)  |
|                                                   | Two                         | 912 (9%)   | 312 (7%)   | 600 (11%)  | 244 (7%)   | 481 (11%)  | 68 (9%)   | 119 (11%)  |
|                                                   | Three or more               | 320 (3%)   | 94 (2%)    | 226 (4%)   | 83 (2%)    | 194 (4%)   | 11 (1%)   | 32 (3%)    |
|                                                   | Incomplete data             | 1095 (11%) | 565 (13%)  | 530 (10%)  | 426 (12%)  | 352 (8%)   | 139 (18%) | 178 (16%)  |

215 IQR= Interquartile Range, SD = standard deviation, kg= kilograms, m=meters

216 <sup>a</sup> *p*-values for difference in mean age between men and women, total population <0.001, rural site <0.001, and urban site = 0.203, results from t-test

217 Body mass index defined as underweight (<18.0 kg/m<sup>2</sup>), normal weight (18.0 – 24.9 kg/m<sup>2</sup>), overweight (25.0 – 29.9 kg/m<sup>2</sup>) and obese (≥30 kg/m<sup>2</sup>)

218 <sup>b</sup> Physical health conditions included diabetes, hypertension, heart disease, stroke, chronic pain, disability, epilepsy, HIV, and asthma. Unadjusted prevalence of multimorbidity

219 We observed significant differences in mean depressive and anxiety symptom scores in the considered  
220 sociodemographic and health-related factors as displayed in S1 Appendix. Specifically, we observed  
221 an increase in the mean depressive symptom scores as the number of physical conditions increased,  
222 with a higher mean score among individuals with three or more physical health conditions.  
223 Additionally, there was a strong correlation between depression and anxiety scores (Spearman  
224 correlation coefficient ( $\rho$ )= 0.68).

#### 225 *Prevalence of long-term conditions and multimorbidity*

226 Figure 1 presents the age-standardized prevalence of physical health conditions and multimorbidity  
227 of these conditions. The age-standardized prevalence of hypertension was significantly higher among  
228 urban (24.3%, 95%CI = 22.6 – 26.0%) compared to rural (15.1%, 95%CI= 14.4 – 15.8%) participants.  
229 The age-standardized prevalence of chronic pain was significantly higher in rural participants (9.3%,  
230 95%CI = 8.7 – 9.9%) as compared to urban participants (6.8%, 95%CI = 5.6 – 8.1%). There were no  
231 significant differences in the age-standardized prevalence of multimorbidity in urban participants  
232 (14.1%,95% CI, 12.5 - 15.8%) and rural individuals (12.2%, 95% CI, 11.6 - 12.9%). Multimorbidity  
233 prevalence increased with age, but no significant differences were observed between males from  
234 urban and rural areas, and females from urban and rural areas (Figure 2).

235 <Insert Figure 1 >

236 Figure 1 Age-standardized prevalence of physical health conditions by site.

237 *Diabetes and hypertension included objective measures plus self-reports while the rest of*  
238 *the conditions were self-reported.*

239

240 <Insert Figure 2>

241 Figure 2 Age- and sex-specific prevalence of multimorbidity by site

242 *Common physical health conditions combinations*

243 The most common disease combinations among individuals with two conditions were hypertension  
244 and disability (18%), and hypertension and chronic pain (14%). Among those with three conditions,  
245 the most prevalent combinations were hypertension, disability, and chronic pain (24%), and  
246 hypertension, disability, and HIV (8%). Diabetes, hypertension, disability, and chronic pain were the  
247 most common combination (23%) among those with four conditions (S2 Appendix).

248 *Association between physical health multimorbidity and common mental health disorders*

249 Table 2 presents the association between physical health multimorbidity and depression and anxiety  
250 scores. After adjusting for covariates, depressive symptom scores significantly increased with an  
251 increasing number of physical health conditions. Compared to those who had no physical health  
252 condition, depressive symptom score ( $y$ ) increased for each increment increase in physical health  
253 conditions ( $x$ ): one condition (Coefficient ( $B$ ) 0.78; 95% CI 0.63–0.95), two conditions ( $B$  1.36; 95% CI  
254 1.14–1.58), and three or more conditions ( $B$  2.23; 95% CI 1.87–2.59),  $p$ -trend <0.001. Similarly,  
255 compared to those without physical health conditions, an increase in anxiety symptom score was  
256 observed for each increment increase in physical health conditions; one condition ( $B$  0.67; 95% CI  
257 0.53–0.81), two conditions ( $B$  1.15; 95%CI 0.96–1.25), and three or more conditions ( $B$  1.58; 95% CI  
258 1.27–1.90),  $p$ -trend <0.001, with adjustment for covariates. While the interaction of sex or site with  
259 the association between physical multimorbidity and mental health conditions were not significant,  
260 the interaction terms for age and physical multimorbidity were significant but the stratified analysis  
261 by age yielded no different results (S3 Appendix).

262

263 Table 2 Association between number of physical health conditions and depression and anxiety  
 264 scores

|                               |                          | Depression score <sup>a</sup> |         |                        |         |                        |         |
|-------------------------------|--------------------------|-------------------------------|---------|------------------------|---------|------------------------|---------|
|                               |                          | Unadjusted Model              |         | Model I                |         | Model II               |         |
| Number of physical conditions |                          | B coefficient (95% CI)        | P-value | B coefficient (95% CI) | P-value | B coefficient (95% CI) | P-value |
|                               | None                     | Ref.                          |         | Ref.                   |         | Ref.                   |         |
|                               | One                      | 0.64 (0.48 – 0.79)            | <0.001  | 0.78 (0.63 – 0.94)     | <0.001  | 0.79 (0.63 – 0.94)     | <0.001  |
|                               | Two                      | 1.04 (0.84 – 1.25)            | <0.001  | 1.34 (1.12 – 1.56)     | <0.001  | 1.36 (1.14 – 1.58)     | <0.001  |
|                               | Three or more            | 1.57 (1.23 – 1.91)            | <0.001  | 2.16 (1.81 – 2.51)     | <0.001  | 2.23 (1.86 – 2.59)     | <0.001  |
|                               | <i>p</i> value for trend | <0.001                        |         | <0.001                 |         | <0.001                 |         |
|                               |                          | Anxiety score <sup>b</sup>    |         |                        |         |                        |         |
| Number of physical conditions |                          |                               |         |                        |         |                        |         |
|                               | None                     | Ref.                          |         | Ref.                   |         | Ref.                   |         |
|                               | One                      | 0.47 (0.32 – 0.63)            | <0.001  | 0.67 (0.53 – 0.81)     | <0.001  | 0.67 (0.53 – 0.81)     | <0.001  |
|                               | Two                      | 0.85 (0.63 – 1.07)            | <0.001  | 1.14 (0.94 – 1.33)     | <0.001  | 1.16 (0.97 – 1.36)     | <0.001  |
|                               | Three or more            | 1.01 (0.76 – 1.45)            | <0.001  | 1.52 (1.20 – 1.83)     | <0.001  | 1.59 (1.27 – 1.91)     | <0.001  |
|                               | <i>p</i> value for trend | <0.001                        |         | <0.001                 |         | <0.001                 |         |

265 <sup>a</sup> Patient Health Questionnaire-9 depression score, measured on continuous scale from 0 – 27.

266 <sup>b</sup> General Anxiety Disorder-7 anxiety score, measured on a continuous scale from 0 – 21.

267 Model I: Adjusted for sex, age, site education, and employment status, marital status.

268 Model II: Adjusted for the variables in Model I plus physical activity, BMI, alcohol status, and smoking status

269

270

271 *Sensitivity analyses*

272 When we compared the sociodemographic factors and the outcomes between those that had  
273 multimorbidity data and those with incomplete multimorbidity data, there were significant  
274 differences in the sociodemographic factors (sex, age, site, education attainment and employment  
275 status), but we detected no significant differences in the mean depressive and anxiety scores between  
276 the two groups (S4 Appendix). A sensitivity analysis to exclude multimorbid individuals with missing  
277 data on other conditions was conducted, and results were fairly consistent (S5 Appendix). Therefore,  
278 results from a sample that included them were reported.

279 **Discussion**

280 Multimorbidity due to physical health conditions was linked to an increase in depression and anxiety  
281 symptom scores in these analyses of early data from an on-going, large, cross-sectional study in urban  
282 and rural Malawian settings. Notably, the greater the number of co-morbid physical health conditions,  
283 the greater the depression and anxiety symptom scores. Furthermore, we observed multimorbidity in  
284 16% of young adults (< 30 years ) in rural and urban areas, which is comparable to the 13% reported  
285 in South Africa within the same age group [53]. These findings suggest that in the future, a sizeable  
286 proportion of the Malawian adult population will be living with multiple long-term health conditions.

287 In these early data, there is a suggestion of differences in prevalence of multimorbidity between urban  
288 and rural dwellers, consistent with the pattern observed in rural and urban India (5.8%; 95% CI 5.7 –  
289 6.0% for rural and 9.7%; 95% CI 9.4 – 19.1%, respectively) [54], albeit with materially higher  
290 multimorbidity estimates in Malawi. The observed multimorbidity differences were in large part  
291 driven by the higher prevalence of hypertension in urban Malawi as previously described [55]. With  
292 nearly 80% of the Malawian population living in rural locations [56] where health services (including  
293 diagnostics and treatments) and clinical expertise is limited, the almost comparable level of  
294 multimorbidity in rural areas, poses a significant challenge for the design and delivery of health care  
295 needed to sustain the health of the population.



296 We observed a strong correlation ( $\rho = 0.68$ ) between PHQ-9 and GAD-7 scores, similar to previous  
297 findings that reported a correlation of 0.65 between these scales [57, 58]. The strong correlation  
298 between scores reflects the common co-existence of these conditions [59, 60], overlapping symptoms  
299 [61] and shared underlying neurobiological and psychological mechanisms [62, 63].

300 We noted a “dose response” increase in depression and anxiety symptoms with an increasing number  
301 of physical conditions, that did not differ between urban and rural populations, and which is consistent  
302 with previous research in other settings. Findings from a nationally representative survey in India have  
303 shown increased odds of having depressive symptoms with an increasing number of chronic morbidity  
304 [22]. A systematic review reported a 45% increase in the likelihood of having a depressive disorder  
305 with each additional chronic physical condition, compared to individuals without any chronic physical  
306 conditions [64]. Similarly, a study encompassing 42 countries [65] showed that compared to  
307 individuals with no physical health condition, the odds of anxiety symptoms were two-fold and five-  
308 fold higher in individuals with one condition and five or more conditions, respectively.

309 In the current study we cannot elucidate the biological mechanisms underpinning the observed  
310 associations between increasing number of long-term physical health conditions and higher self-  
311 reported depression and anxiety symptoms. However, future studies will investigate the role of  
312 inflammatory biomarkers such as C-reactive protein which have been shown to predict long-term  
313 conditions such as heart disease, hypertension and diabetes [66] and may also increase susceptibility  
314 to genetic and environmental stressors, which may subsequently contribute to the onset of depressive  
315 symptoms [67, 68]. Polypharmacy, which is common in multimorbid individuals [64], has also been  
316 linked with depression [69, 70]. Furthermore, the need for ongoing adherence to treatment programs  
317 for multiple conditions [71], the detrimental impacts on daily activities [72] and increased social  
318 isolation [73-75] experienced with multimorbidity, are recognised risk factors for depression. Fear and  
319 worry associated with managing various diseases and possible lack of treatment or treatment  
320 inefficacy has also been linked with increased anxiety [76]. We have previously shown that the burden

321 of “lack of treatment” in underserved populations in Malawi is a key factor in wellbeing in those  
322 suffering from long-term conditions [77], and out-of-pocket costs of care will exacerbate that anxiety,  
323 hence it is plausible that those with multiple long term conditions who, due the fragmented nature of  
324 primary care services and need to attend multiple clinics to access appropriate care, may be  
325 disproportionately affected compared to those with single diagnosed conditions.

326 In terms of patterns of multimorbidity, hypertension, disability, and chronic pain were the most  
327 common combination in our setting. People living with disability and chronic pain may experience  
328 challenges in daily living [78], including their ability to work and socialize [79], which may contribute  
329 to poor mental health and which may be exacerbated by limited access to appropriate treatment and  
330 support [80]. Chronic pain has been shown to negatively impact sleep quality and to increase stress  
331 levels, which may also contribute to the development of depression [81]. Specifically, an earlier study  
332 in rural Malawi reported a significant correlation between chronic pain and poor mental health, as  
333 measured using PHQ-9 and GAD-7 [82]. To better understand the extent to which modifiable lifestyle  
334 determinates differentially impact the risk for long-term health conditions in rural and urban African  
335 populations, it is necessary to have detailed and accurate physical activity, sleep, and diet data from  
336 large population-based studies. Some of these data will become available from the current study once  
337 data collection is complete.

338 The strength of this research includes the availability of standardised, detailed, and comparable data  
339 from urban and rural settings across the adult population aged 15 years and older.

340 Limitations include the cross-sectional design and potential for reverse causation in the observed  
341 associations. To determine causal relationships and the extent to which the relationship between  
342 physical multimorbidity and common mental health disorders is bidirectional, will require long term  
343 follow-up (which will become available in future), and scheduled ascertainment of time changing data,  
344 including lifestyle and physical and mental health conditions. The definition of multimorbidity was

345 limited to the conditions available in our datasets and did not include all long-term health conditions,  
346 affecting adults in Malawi, such as chronic obstructive pulmonary disease [83].

347 We observed some differences in the sociodemographic factors of our participants and those of the  
348 wider HDSS adult populations which may affect the generalisability of our findings and highlights the  
349 importance of using alternative strategies to improve recruitment in these groups for the ongoing  
350 study. We excluded individuals with incomplete data regarding their health conditions, except for  
351 those cases where we could categorize them based on available data as having either two or three or  
352 more physical health conditions. This approach might have resulted in some misclassification and an  
353 underestimation of the strength of the observed associations. Nevertheless, observed associations did  
354 not change materially following exclusion of these individuals, suggesting that the effect of  
355 misclassification was minimal.

356 Lastly, it is important to note that these analyses were conducted on a subset of the study. In future  
357 analyses, when larger, more population-representative data become available, we will be adequately  
358 powered to investigate associations stratified by age-, sex-, and urban-rural location and to investigate  
359 the impact of knowledge of multimorbidity on mental health by disaggregating those with a prior  
360 diagnosis of conditions (such as diabetes or hypertension) from those who are newly diagnosed during  
361 the survey. This will allow us to gain deeper insights into the unique challenges faced by each group  
362 and their respective impacts on well-being.

363 Our early findings highlight the need for a holistic approach to patient care in rural and urban Malawi  
364 to address the substantive proportion of adolescents and adults living with multiple physical health  
365 conditions and poor mental health. Constrained by limited resources, this poses a significant  
366 challenge for health policy makers to design and deliver an effective and sustainable health system.  
367 Possible approaches include; clinical and nursing training curricula that address multimorbidity  
368 scenarios [84], to ensure healthcare professionals are equipped to support management of a variety  
369 of long-term conditions (including common mental disorders) [85] and streamlining healthcare

370 processes toward holistic care [86], through provision of integrated services for the treatment of  
371 commonly co-occurring condition, including support of self-management programmes. In Malawi, this  
372 necessitates the addition of mental health services within primary care settings [87], training health-  
373 care workers in mental health screening and management, establishing referral pathways to mental  
374 health lay counsellors or clinical specialists, and availability of psychosocial support services.  
375 Interventions that are scalable and sustainable in low resource environments are essential if we are  
376 to address the current challenges associated with accessing multiple treatments and services in  
377 Malawi.

378 Furthermore, interventions dedicated to improving the coordination of care for the elderly  
379 population, who face the highest burden of multimorbidity, are not widespread in Malawi [83]. There  
380 is a pressing need for such interventions, along with effective policies for disease prevention and the  
381 promotion of healthy living. These interventions might include tobacco and sugar taxation, regulated  
382 advertising, salt reduction strategies, improved public infrastructure to facilitate physical activity,  
383 school- and workplace-based programs promoting healthy lifestyles, as well as mental health and well-  
384 being, and early identification and management of health conditions [84].

## 385 **Conclusion**

386 Our findings highlight the burden of common mental health disorders in individuals living with  
387 multiple long term physical health conditions. Efforts are urgently needed to design and deliver  
388 effective, holistic health care for people living with multiple physical and mental health conditions in  
389 rural and urban Malawi.

## 390 **Data availability statement**

391 The anonymized data relevant to this study can be obtained by submitting a reasonable request to  
392 the Malawi Epidemiology and Intervention Research Unit's Data Documentalist. For data inquiries,  
393 please feel free to contact Paul Kambiya at [paul.kambiya@meiru.mw](mailto:paul.kambiya@meiru.mw).

394 **Funding**

395 This work is supported by the Wellcome Trust, awarded to ACC (217073/Z/19/Z). The funder has no  
396 involvement in the study design, data collection, analysis, decision to publish, or the preparation of  
397 the manuscript. All aspects of the research have been conducted independently and are solely the  
398 responsibility of the authors.

399 **Competing interests**

400 The authors have no competing interests to declare.

401 **Acknowledgements**

402 The authors express their sincere gratitude to the participants for generously giving their time and  
403 cooperation. We would also like to extend our appreciation to the Healthy Lives field interviewers and  
404 MEIRU laboratory staff for their unwavering dedication and invaluable contributions to this ongoing  
405 work.

406 For the purpose of open access, the author(s) has applied a Creative Commons Attribution (CC BY)  
407 licence to any Author Accepted Manuscript version arising from this submission.

408 **Author Contributions**

409 **Conceptualization:** Owen Nkoka, Amelia C. Crampin, Alison J. Price

410 **Data curation:** Owen Nkoka, Estelle Mclean, Amelia C. Crampin, Alison J. Price

411 **Formal analysis:** Owen Nkoka, Amelia C. Crampin, Alison J. Price

412 **Funding acquisition:** Amelia C. Crampin Alison J. Price

413 **Methodology:** Owen Nkoka, Shekinah Munthali, Kondwani Mwandira, Albert Dube

414 Amelia C. Crampin, Alison J. Price

415 **Project Administration:** Owen Nkoka, Shekinah Munthali-Mkandawire, Kondwani Mwandira, Albert  
416 Dube, Innocent Nyanjagha, Angella Mainjeni, Providence Nindi, Jullita Malava, Robert Stewart, Abena  
417 S. Amoah, Amelia C. Crampin, Alison J. Price

418 **Resources:** Amelia C. Crampin

419 **Writing original draft:** Owen Nkoka, Amelia C. Crampin, Alison J. Price

420 **Writing – review & editing:** Owen Nkoka, Shekinah Munthali-Mkandawire, Kondwani Mwandira,  
421 Providence Nindi, Albert Dube, Innocent Nyanjagha, Angella Mainjeni, Jullita Malava, Abena S. Amoah,  
422 Robert Stewart, Amelia C. Crampin, Alison J. Price

423

## 424 **References**

- 425 1. Tabutin, D. and B. Masquelier, Tendances et inégalités de mortalité de 1990 à 2015 dans les  
426 pays à revenu faible et intermédiaire. 2017. 72(2): p. 227-307.
- 427 2. Sudharsanan, N., D.E. Bloom, and N. Sudharsanan. The demography of aging in low-and  
428 middle-income countries: chronological versus functional perspectives. in Future directions  
429 for the demography of aging: Proceedings of a workshop. 2018.
- 430 3. Salami, D., A.N. Shaaban, and M.D.R. Oliveira Martins, Africa Rising, a Narrative for Life  
431 Expectancy Gains? Evidence from a Health Production Function. *Ann Glob Health*, 2019. 85(1).
- 432 4. Chewe, M. and P. Hangoma, Drivers of Health in sub-Saharan Africa: A Dynamic Panel Analysis.  
433 *Health Policy OPEN*, 2020. 1: p. 100013.
- 434 5. Trickey, A., et al., Life expectancy after 2015 of adults with HIV on long-term antiretroviral  
435 therapy in Europe and North America: a collaborative analysis of cohort studies. 2023. 10(5):  
436 p. e295-e307.
- 437 6. Gona, P.N., et al., Burden and changes in HIV/AIDS morbidity and mortality in Southern Africa  
438 Development Community Countries, 1990–2017. *BMC Public Health*, 2020. 20(1): p. 867.
- 439 7. Callahan, D., Medical Progress and Global Chronic Disease: The Need for a New Model. *The*  
440 *Brown Journal of World Affairs*, 2013. 20(1): p. 35-46.
- 441 8. Basto-Abreu, A., et al., Multimorbidity matters in low and middle-income countries. *J*  
442 *Multimorb Comorb*, 2022. 12: p. 26335565221106074.
- 443 9. Chowdhury, S.R., et al., Global and regional prevalence of multimorbidity in the adult  
444 population in community settings: a systematic review and meta-analysis. 2023. 57.
- 445 10. Abebe, F., et al., Multimorbidity of chronic non-communicable diseases in low-and middle-  
446 income countries: a scoping review. 2020. 10: p. 2235042X20961919.
- 447 11. van den Akker, M., et al., Children and adolescents are not small adults: toward a better  
448 understanding of multimorbidity in younger populations. *Journal of Clinical Epidemiology*,  
449 2022. 149: p. 165-171.
- 450 12. Roche, S. and E. De Vries, Multimorbidity in a large district hospital: A descriptive cross-  
451 sectional study. *S Afr Med J*, 2017. 107(12): p. 1110-1115.

- 452 13. Tegethoff, M., et al., Association between mental disorders and physical diseases in  
453 adolescents from a nationally representative cohort. *Psychosom Med*, 2015. 77(3): p. 319-32.
- 454 14. Ioakeim-Skoufa, I., et al., Multimorbidity Patterns in the General Population: Results from the  
455 EpiChron Cohort Study. *Int J Environ Res Public Health*, 2020. 17(12).
- 456 15. Asogwa, O.A., et al., Multimorbidity of non-communicable diseases in low-income and middle-  
457 income countries: a systematic review and meta-analysis. *BMJ Open*, 2022. 12(1): p. e049133.
- 458 16. Chowdhury, S.R., et al., Global and regional prevalence of multimorbidity in the adult  
459 population in community settings: a systematic review and meta-analysis. *EClinicalMedicine*,  
460 2023. 57: p. 101860.
- 461 17. Rathod, S., et al., Mental Health Service Provision in Low- and Middle-Income Countries.  
462 *Health Serv Insights*, 2017. 10: p. 1178632917694350.
- 463 18. Naslund, J.A., et al., Exploring opportunities to support mental health care using social media:  
464 A survey of social media users with mental illness. 2019. 13(3): p. 405-413.
- 465 19. Alloh, F.T., et al., Mental Health in low-and middle income countries (LMICs): Going beyond  
466 the need for funding. 2018. 17(1): p. 12-17.
- 467 20. Blasco, B.V., et al., Obesity and Depression: Its Prevalence and Influence as a Prognostic  
468 Factor: A Systematic Review. *Psychiatry Investig*, 2020. 17(8): p. 715-724.
- 469 21. Morales, D.A., et al., A call to action to address rural mental health disparities. 2020. 4(5): p.  
470 463-467.
- 471 22. Singh, S., N. Shri, and L.K. Dwivedi, An association between multi-morbidity and depressive  
472 symptoms among Indian adults based on propensity score matching. *Scientific Reports*, 2022.  
473 12(1): p. 15518.
- 474 23. Ministry of Health (MOH), Malawi. Malawi Population-based HIV Impact Assessment 2020-  
475 2021 (MPHIA 2020-2021): Final Report. Lilongwe: MOH, Malawi; November, 2022.
- 476 24. Albrecht, T., et al., Many diseases, one model of care? *J Comorb*, 2016. 6(1): p. 12-20.
- 477 25. Olds, P., et al., Non-communicable disease burden among inpatients at a rural district hospital  
478 in Malawi. *Global Health Research and Policy*, 2023. 8(1): p. 4.
- 479 26. Gowshall, M. and S.D. Taylor-Robinson, The increasing prevalence of non-communicable  
480 diseases in low-middle income countries: the view from Malawi. *Int J Gen Med*, 2018. 11: p.  
481 255-264.
- 482 27. Kim, M.H., et al., Prevalence of depression and validation of the Beck Depression Inventory-II  
483 and the Children's Depression Inventory-Short amongst HIV-positive adolescents in Malawi. *J*  
484 *Int AIDS Soc*, 2014. 17(1): p. 18965.
- 485 28. Udedi, M., The prevalence of depression among patients and its detection by primary health  
486 care workers at Matawale Health Centre (Zomba). *Malawi Med J*, 2014. 26(2): p. 34-7.
- 487 29. Lilford, P., Mental health in Malawi. *BJPsych Int*, 2020. 17(2): p. 32-33.
- 488 30. Dregan, A., et al., Common mental disorders within chronic inflammatory disorders: a primary  
489 care database prospective investigation. 2019. 78(5): p. 688-695.
- 490 31. Repousi, N., et al., Depression and metabolic syndrome in the older population: A review of  
491 evidence. 2018. 237: p. 56-64.
- 492 32. Liu, Y.Z., Y.X. Wang, and C.L. Jiang, Inflammation: The Common Pathway of Stress-Related  
493 Diseases. *Front Hum Neurosci*, 2017. 11: p. 316.
- 494 33. Vancampfort, D., et al., *World Psychiatry*. 2016.
- 495 34. Cohen, B.E., D. Edmondson, and I.M.J.A.j.o.h. Kronish, State of the art review: depression,  
496 stress, anxiety, and cardiovascular disease. 2015. 28(11): p. 1295-1302.
- 497 35. Batelaan, N.M., et al., Anxiety and new onset of cardiovascular disease: critical review and  
498 meta-analysis. 2016. 208(3): p. 223-231.
- 499 36. Daré, L.O., et al., Co-morbidities of mental disorders and chronic physical diseases in  
500 developing and emerging countries: a meta-analysis. *BMC Public Health*, 2019. 19(1): p. 304.

- 501 37. Asmare, Y., A. Ali, and A. Belachew, Magnitude and associated factors of depression among  
502 people with hypertension in Addis Ababa, Ethiopia: a hospital based cross-sectional study.  
503 BMC Psychiatry, 2022. 22(1): p. 327.
- 504 38. Ogunsakin, R.E., et al., Meta-analysis of studies on depression prevalence among diabetes  
505 mellitus patients in Africa. 2021. 7(5): p. e07085.
- 506 39. Grimsrud, A., et al., The association between hypertension and depression and anxiety  
507 disorders: results from a nationally-representative sample of South African adults. PLoS One,  
508 2009. 4(5): p. e5552.
- 509 40. Crampin, A.C., et al., Profile: The Karonga Health and Demographic Surveillance System.  
510 International Journal of Epidemiology, 2012. 41(3): p. 676-685.
- 511 41. Munthali, K.G.J.U.D.i.A. and A.G.A.o. Metropolises, Lilongwe metropolitan area. 2017: p. 319-  
512 345.
- 513 42. Hartung, C., et al. Open data kit: tools to build information services for developing regions. in  
514 Proceedings of the 4th ACM/IEEE international conference on information and  
515 communication technologies and development. 2010.
- 516 43. Manea, L., S. Gilbody, and D.J.G.h.p. McMillan, A diagnostic meta-analysis of the Patient  
517 Health Questionnaire-9 (PHQ-9) algorithm scoring method as a screen for depression. 2015.  
518 37(1): p. 67-75.
- 519 44. Kroenke, K., R.L. Spitzer, and J.B.J.J.o.g.i.m. Williams, The PHQ-9: validity of a brief depression  
520 severity measure. 2001. 16(9): p. 606-613.
- 521 45. Spitzer, R.L., et al., A brief measure for assessing generalized anxiety disorder: the GAD-7.  
522 2006. 166(10): p. 1092-1097.
- 523 46. Madans, J.H., M.E. Loeb, and B.M. Altman. Measuring disability and monitoring the UN  
524 Convention on the Rights of Persons with Disabilities: the work of the Washington Group on  
525 Disability Statistics. in BMC public health. 2011. BioMed Central.
- 526 47. Treede, R.-D., et al., A classification of chronic pain for ICD-11. 2015. 156(6): p. 1003.
- 527 48. Santé, O.M.d.l., Global Recommendations on Physical Activity for Health. 2010: World Health  
528 Organization.
- 529 49. WHO. Obesity: Preventing and Managing The Global Epidemic. [Internet]. 2000. Available  
530 from: [https://whqlibdoc.who.int/trs/WHO\\_TRS\\_894.pdf](https://whqlibdoc.who.int/trs/WHO_TRS_894.pdf).
- 531 50. Ahmad, O.B., et al., Age standardization of rates: a new WHO standard. 2001. 9(10): p. 1-14.
- 532 51. Patino, C.M. and J.C. Ferreira, Test for trend: evaluating dose-response effects in association  
533 studies. J Bras Pneumol, 2016. 42(4): p. 240.
- 534 52. Vittinghoff, E., et al., Regression methods in biostatistics: linear, logistic, survival, and  
535 repeated measures models. 2006.
- 536 53. Roomaney, R.A., et al., One in five South Africans are multimorbid: An analysis of the 2016  
537 demographic and health survey. PLOS ONE, 2022. 17(5): p. e0269081.
- 538 54. Prenissl, J., et al., Patterns of multimorbidity in India: A nationally representative cross-  
539 sectional study of individuals aged 15 to 49 years. PLOS Global Public Health, 2022. 2(8): p.  
540 e0000587.
- 541 55. Price, A.J., et al., Prevalence of obesity, hypertension, and diabetes, and cascade of care in  
542 sub-Saharan Africa: a cross-sectional, population-based study in rural and urban Malawi.  
543 Lancet Diabetes Endocrinol, 2018. 6(3): p. 208-222.
- 544 56. National Statistical Office. Malawi Population and Housing Census 2018. Zomba, Malawi.
- 545 57. Smith, M., et al., Clinical judgement, case complexity and symptom scores as predictors of  
546 outcome in depression: an exploratory analysis. 2020. 20: p. 1-11.
- 547 58. Boothroyd, L., D. Dagnan, and S.J.H.P.C. Muncer, Psychometric analysis of the Generalized  
548 Anxiety Disorder Scale and the Patient Health Questionnaire using Mokken scaling and  
549 confirmatory factor analysis. 2018. 2: p. 1-4.
- 550 59. Mathew, A., et al., Co-morbidity between major depressive disorder and anxiety disorders:  
551 shared etiology or direct causation? 2011. 41(10): p. 2023-2034.



- 552 60. Kalin, N.H.J.A.J.o.P., The critical relationship between anxiety and depression. 2020, Am  
553 Psychiatric Assoc. p. 365-367.
- 554 61. Zbozinek, T.D., et al., Diagnostic overlap of generalized anxiety disorder and major depressive  
555 disorder in a primary care sample. *Depress Anxiety*, 2012. 29(12): p. 1065-71.
- 556 62. Kovner, R., J.A. Oler, and N.H.J.A.J.o.P. Kalin, Cortico-limbic interactions mediate adaptive and  
557 maladaptive responses relevant to psychopathology. 2019. 176(12): p. 987-999.
- 558 63. Etkin, A. and A.F.J.A.J.o.P. Schatzberg, Common abnormalities and disorder-specific  
559 compensation during implicit regulation of emotional processing in generalized anxiety and  
560 major depressive disorders. 2011. 168(9): p. 968-978.
- 561 64. Read, J.R., et al., Multimorbidity and depression: a systematic review and meta-analysis. 2017.  
562 221: p. 36-46.
- 563 65. Vancampfort, D., et al., The relationship between chronic physical conditions, multimorbidity  
564 and anxiety in the general population: A global perspective across 42 countries. *Gen Hosp  
565 Psychiatry*, 2017. 45: p. 1-6.
- 566 66. Juber, N., C.-C. Lee, and J.J.J.B. Liu, Associations between high-sensitivity C-reactive protein  
567 and non-communicable diseases in an Asian population: findings from the IFLS study. 2021.  
568 26(6): p. 548-556.
- 569 67. Miller, A.H. and C.L. Raison, The role of inflammation in depression: from evolutionary  
570 imperative to modern treatment target. *Nat Rev Immunol*, 2016. 16(1): p. 22-34.
- 571 68. van den Bosch, M. and A.J.A.r.o.p.h. Meyer-Lindenberg, Environmental exposures and  
572 depression: biological mechanisms and epidemiological evidence. 2019. 40: p. 239-259.
- 573 69. Palapinyo, S., et al., Association between polypharmacy and depression: a systematic review  
574 and meta-analysis. 2021. 51(4): p. 280-299.
- 575 70. Wiersema, C., et al., Determinants and consequences of polypharmacy in patients with a  
576 depressive disorder in later life. *Acta Psychiatr Scand*, 2022. 146(1): p. 85-97.
- 577 71. Heckman, B.W., A.R. Mathew, and M.J. Carpenter, Treatment Burden and Treatment Fatigue  
578 as Barriers to Health. *Curr Opin Psychol*, 2015. 5: p. 31-36.
- 579 72. Ralph, N.L., et al., Peer Reviewed: Multiple chronic conditions and limitations in activities of  
580 daily living in a community-based sample of older adults in New York City, 2009. 2013. 10.
- 581 73. Leigh-Hunt, N., et al., An overview of systematic reviews on the public health consequences  
582 of social isolation and loneliness. 2017. 152: p. 157-171.
- 583 74. Santini, Z.I., et al., The association between social relationships and depression: A systematic  
584 review. 2015. 175: p. 53-65.
- 585 75. Ma, R., et al., Physical Multimorbidity and Social Participation in Adult Aged 65 Years and Older  
586 From Six Low- and Middle-Income Countries. *The Journals of Gerontology: Series B*, 2021.  
587 76(7): p. 1452-1462.
- 588 76. Brown, A., et al., Managing uncertainty in chronic illness from patient perspectives. 2020. 2(1):  
589 p. 1.
- 590 77. Chikumbu, E.F., et al., Experiences of multimorbidity in urban and rural Malawi: An interview  
591 study of burdens of treatment and lack of treatment. *PLOS Global Public Health*, 2022. 2(3):  
592 p. e0000139.
- 593 78. Grant, M., et al., Obstacles to returning to work with chronic pain: in-depth interviews with  
594 people who are off work due to chronic pain and employers. *BMC Musculoskeletal Disorders*,  
595 2019. 20(1): p. 486.
- 596 79. Jung, Y.H., et al., Impact of the Acceptance of Disability on Self-Esteem among Adults with  
597 Disabilities: A Four-Year Follow-Up Study. *Int J Environ Res Public Health*, 2022. 19(7).
- 598 80. Harrison, J.A.K., et al., Access to health care for people with disabilities in rural Malawi: what  
599 are the barriers? *BMC Public Health*, 2020. 20(1): p. 833.
- 600 81. Alhalal, E.A., et al., Effects of chronic pain on sleep quality and depression: A cross-sectional  
601 study. *Saudi Med J*, 2021. 42(3): p. 315-323.

- 602 82. Kohler, I.V., et al., Pain Is Widespread and Predicts Poor Mental Health Among Older Adults in  
603 Rural Malawi. *Innov Aging*, 2022. 6(3): p. igac008.
- 604 83. Njoroge, M.W., et al., Changing lung function and associated health-related quality-of-life: A  
605 five-year cohort study of Malawian adults. *eClinicalMedicine*, 2021. 41: p. 101166.
- 606 84. Whitty, C.J., et al., Rising to the challenge of multimorbidity. 2020, British Medical Journal  
607 Publishing Group.
- 608 85. Leiva-Fernández, F., et al., Training primary care professionals in multimorbidity management:  
609 educational assessment of the eMULTIPAP course. 2020. 192: p. 111354.
- 610 86. The, P.M.E., Multimorbidity: Addressing the next global pandemic. *PLOS Medicine*, 2023.  
611 20(4): p. e1004229.
- 612 87. Stein, D.J., et al., Integrating mental health with other non-communicable diseases. 2019. 364.
- 613
- 614

| <b>S1 Appendix</b> It is made available under a <a href="https://creativecommons.org/licenses/by/4.0/">CC-BY 4.0 International license</a> . |                                   |                  |                 |
|----------------------------------------------------------------------------------------------------------------------------------------------|-----------------------------------|------------------|-----------------|
| <b>S1 Appendix Association between sociodemographic and lifestyle factors and depression and anxiety scores</b>                              |                                   |                  |                 |
| Variable                                                                                                                                     |                                   | PHQ-9, mean (SD) | GAD7, mean (SD) |
| <b>Site</b>                                                                                                                                  |                                   |                  |                 |
|                                                                                                                                              | Karonga (rural)                   | 1.6 (2.8)        | 1.3 (2.5)       |
|                                                                                                                                              | Lilongwe (Urban)                  | 2.8 (3.5)        | 1.9 (2.9)       |
|                                                                                                                                              | t, p-value                        | - 15.5, <0.001   | -8.8. <0.001    |
| <b>Age group (years) <sup>a</sup></b>                                                                                                        |                                   |                  |                 |
|                                                                                                                                              | 15 – 17                           | 1.1 (2.0)        | 0.8 (1.7)       |
|                                                                                                                                              | 18 – 29                           | 2.0 (3.1)        | 1.5 (2.6)       |
|                                                                                                                                              | 30 – 39                           | 2.1 (3.3)        | 1.6 (2.9)       |
|                                                                                                                                              | 40 – 49                           | 1.8 (3.0)        | 1.4 (2.5)       |
|                                                                                                                                              | 50 – 59                           | 1.7 (2.9)        | 1.4 (2.5)       |
|                                                                                                                                              | ≥60                               | 1.5 (2.8)        | 1.1 (2.5)       |
|                                                                                                                                              | F, p-value                        | 21.1, <0.001     | 18.1, <0.001    |
| <b>Sex</b>                                                                                                                                   |                                   |                  |                 |
|                                                                                                                                              | Male                              | 1.7 (2.9)        | 1.3 (2.4)       |
|                                                                                                                                              | Female                            | 1.9 (3.0)        | 1.5 (2.7)       |
|                                                                                                                                              | t, p-value                        | - 2.2, 0.031     | -4.4. <0.001    |
| <b>Education attainment <sup>a</sup></b>                                                                                                     |                                   |                  |                 |
|                                                                                                                                              | Not completed any level           | 1.7 (2.8)        | 1.4 (2.5)       |
|                                                                                                                                              | Primary                           | 1.8 (3.1)        | 1.3 (2.7)       |
|                                                                                                                                              | Junior secondary                  | 1.9 (2.8)        | 1.4 (2.5)       |
|                                                                                                                                              | Senior secondary & post-secondary | 2.2 (3.2)        | 1.6 (2.6)       |
|                                                                                                                                              | Missing                           | 1.6 (2.5)        | 1.1 (2.1)       |
|                                                                                                                                              | F, p-value                        | 10.0, <0.001     | 2.9, 0.023      |
| <b>Marital status <sup>a</sup></b>                                                                                                           |                                   |                  |                 |
|                                                                                                                                              | Never married                     | 1.6 (2.7)        | 1.2 (2.2)       |
|                                                                                                                                              | Married                           | 1.9 (3.1)        | 1.5 (2.7)       |
|                                                                                                                                              | Divorced/separated/Widowed        | 2.0 (3.1)        | 1.6 (2.8)       |
|                                                                                                                                              | F, p-value                        | 9.0, <0.001      | 14.3, <0.001    |
| <b>Employment <sup>a</sup></b>                                                                                                               |                                   |                  |                 |
|                                                                                                                                              | Not employed                      | 2.1 (3.2)        | 1.5 (2.7)       |
|                                                                                                                                              | Full-time student                 | 1.4 (2.4)        | 1.0 (2.0)       |
|                                                                                                                                              | Self/irregular                    | 1.8 (2.9)        | 1.4 (2.6)       |
|                                                                                                                                              | Employed/regular                  | 2.2 (3.1)        | 1.5 (2.6)       |
|                                                                                                                                              | F, p-value                        | 19.4, <0.001     | 13.9, <0.001    |
| <b>Smoking status</b>                                                                                                                        |                                   |                  |                 |
|                                                                                                                                              | Never                             | 1.8 (2.9)        | 1.4 (2.6)       |
|                                                                                                                                              | Former/Current                    | 2.5 (3.3)        | 1.6 (2.9)       |
|                                                                                                                                              | t, p-value                        | -3.5, <0.001     | -2.5, 0.013     |
| <b>Alcohol consumption</b>                                                                                                                   |                                   |                  |                 |
|                                                                                                                                              | Not in last year                  | 1.8 (2.9)        | 1.3 (2.5)       |
|                                                                                                                                              | In last year                      | 2.1 (3.1)        | 1.6 (2.7)       |
|                                                                                                                                              | Missing                           | 5.8 (5.5)        | 1.7 (2.1)       |
|                                                                                                                                              | F, p-value                        | 16.7, <0.001     | 9.2, <0.001     |
| <b>Physical activity <sup>a</sup></b>                                                                                                        |                                   |                  |                 |
|                                                                                                                                              | Not met strength guidelines       | 1.8 (3.0)        | 1.4 (2.6)       |
|                                                                                                                                              | Met strength guidelines           | 1.9 (2.9)        | 1.4 (2.4)       |
|                                                                                                                                              | Missing                           | 0.8 (1.6)        | 0.5 (1.3)       |
|                                                                                                                                              | F, p-value                        | 9.9, <0.001      | 8.4, <0.001     |
| <b>Body mass index (kg/m<sup>2</sup>)</b>                                                                                                    |                                   |                  |                 |
|                                                                                                                                              | Underweight                       | 1.6 (2.8)        | 1.2 (2.5)       |
|                                                                                                                                              | Normal                            | 1.8 (3.0)        | 1.4 (2.6)       |
|                                                                                                                                              | Overweight                        | 1.9 (2.9)        | 1.4 (2.6)       |
|                                                                                                                                              | Obese                             | 2.0 (2.9)        | 1.5 (2.6)       |
|                                                                                                                                              | Missing                           | 2.0 (3.5)        | 1.2 (2.5)       |

615  
616  
617  
618  
619  
620

|                                                                                                                                   |                                      |               |              |
|-----------------------------------------------------------------------------------------------------------------------------------|--------------------------------------|---------------|--------------|
|                                                                                                                                   | F, <i>p</i> -value                   | 2.3 , 0.059   | 1.9, 0.107   |
|                                                                                                                                   | Number of physical health conditions |               |              |
|                                                                                                                                   | None                                 | 1.5 (2.6)     | 1.2 (2.2)    |
|                                                                                                                                   | One                                  | 2.2 (3.2)     | 1.7 (3.0)    |
|                                                                                                                                   | Two                                  | 2.6 (3.7)     | 2.0 (3.3)    |
|                                                                                                                                   | Three or more                        | 3.1 (3.9)     | 2.2 (3.4)    |
|                                                                                                                                   | Incomplete data                      | 1.7 (2.7)     | 1.3 (2.5)    |
|                                                                                                                                   | F, <i>p</i> -value                   | 50.2 , <0.001 | 41.8, <0.001 |
| F means F-value from ANOVA<br>t means t-value from t-test<br><sup>a</sup> Bonferroni post-hoc test was done for significant ANOVA |                                      |               |              |

621 **S2 Appendix**

622

623

624

625

626

627

628

629

630

631

632

633

634

635

636

637

638

639

| <b>S2 Appendix Common combinations of multiple health conditions</b>                        |              |
|---------------------------------------------------------------------------------------------|--------------|
| <b>Health condition combination <sup>a</sup></b>                                            | <b>n (%)</b> |
| <i>Two conditions (n = 912)</i>                                                             |              |
| Hypertension + disability                                                                   | 164 (18%)    |
| Hypertension + chronic pain                                                                 | 127 (14%)    |
| Disability + chronic pain                                                                   | 87 (10%)     |
| Hypertension + HIV                                                                          | 78 (9%)      |
| Hypertension + asthma                                                                       | 66 (7%)      |
| Hypertension + diabetes                                                                     | 60 (6%)      |
| <i>Three conditions (n = 263)</i>                                                           |              |
| Hypertension + disability + chronic pain                                                    | 64 (24%)     |
| Hypertension + disability + HIV                                                             | 22 (8%)      |
| Diabetes + hypertension + disability                                                        | 21 (8%)      |
| Hypertension + disability + asthma                                                          | 14 (5%)      |
| Hypertension+ disability + stroke                                                           | 13 (5%)      |
| Disability + asthma + chronic pain                                                          | 13 (5%)      |
| <i>Four conditions (n = 47)</i>                                                             |              |
| Diabetes + hypertension + disability + chronic pain                                         | 11 (23%)     |
| Hypertension + disability + asthma + chronic pain                                           | 6 (13%)      |
| Hypertension + disability + heart disease + chronic pain                                    | 3 (6%)       |
| <i>Five conditions (n = 10)</i>                                                             |              |
| Diabetes, hypertension, disability, heart disease, chronic pain                             | 2 (20%)      |
| Diabetes, hypertension, disability, asthma, chronic pain                                    | 2 (20%)      |
| <sup>a</sup> Only combinations of conditions with prevalence ≥ 5% are presented in table S1 |              |

### S3 Appendix

| S3 Appendix Sensitivity analysis of the association between number of physical health conditions and depression and anxiety scores, stratified by age                                                                                                                                                                                                                                                                   |  |                               |         |                        |         |                        |         |                        |         |                        |         |
|-------------------------------------------------------------------------------------------------------------------------------------------------------------------------------------------------------------------------------------------------------------------------------------------------------------------------------------------------------------------------------------------------------------------------|--|-------------------------------|---------|------------------------|---------|------------------------|---------|------------------------|---------|------------------------|---------|
|                                                                                                                                                                                                                                                                                                                                                                                                                         |  | Depression score <sup>a</sup> |         |                        |         |                        |         |                        |         |                        |         |
|                                                                                                                                                                                                                                                                                                                                                                                                                         |  | 15 – 17 years                 |         | 18 – 29 years          |         | 30 – 39 years          |         | 40 – 49 years          |         | ≥50 years              |         |
| Number of physical conditions                                                                                                                                                                                                                                                                                                                                                                                           |  | B coefficient (95% CI)        | P-value | B coefficient (95% CI) | P-value | B coefficient (95% CI) | P-value | B coefficient (95% CI) | P-value | B coefficient (95% CI) | P-value |
| None                                                                                                                                                                                                                                                                                                                                                                                                                    |  | Ref.                          |         | Ref.                   |         | Ref.                   |         | Ref.                   |         | Ref.                   |         |
| One                                                                                                                                                                                                                                                                                                                                                                                                                     |  | 0.65 (0.07 – 1.23)            | 0.028   | 1.02 (0.74 – 1.29)     | <0.001  | 0.91 (0.56 – 1.26)     | <0.001  | 0.30 (-0.07 – 0.69)    | 0.113   | 0.45 (0.07 – 0.82)     | 0.019   |
| Two                                                                                                                                                                                                                                                                                                                                                                                                                     |  | 1.28 (0.34 – 2.22)            | 0.008   | 1.51 (1.02 – 2.01)     | <0.001  | 1.57 (1.03 – 2.11)     | <0.001  | 1.57 (1.09 – 2.05)     | <0.001  | 0.56 (0.16 – 0.96)     | 0.007   |
| Three or more                                                                                                                                                                                                                                                                                                                                                                                                           |  | -                             | -       | 3.80 (2.46 – 5.13)     | <0.001  | 2.56 (1.29 – 3.82)     | <0.001  | 1.96 (1.20 – 2.71)     | <0.001  | 1.52 (1.01 – 2.03)     | <0.001  |
|                                                                                                                                                                                                                                                                                                                                                                                                                         |  | Anxiety score <sup>b</sup>    |         |                        |         |                        |         |                        |         |                        |         |
| Number of physical conditions                                                                                                                                                                                                                                                                                                                                                                                           |  |                               |         |                        |         |                        |         |                        |         |                        |         |
| None                                                                                                                                                                                                                                                                                                                                                                                                                    |  | Ref.                          |         | Ref.                   |         | Ref.                   |         | Ref.                   |         | Ref.                   |         |
| One                                                                                                                                                                                                                                                                                                                                                                                                                     |  | 0.82 (0.32 – 1.32)            | 0.001   | 0.74 (0.49 – 0.97)     | <0.001  | 0.84 (0.52 – 1.67)     | <0.001  | 0.39 (0.08 – 0.70)     | 0.013   | 0.30 (-0.04 – 0.64)    | 0.079   |
| Two                                                                                                                                                                                                                                                                                                                                                                                                                     |  | 1.57 (0.76 – 2.38)            | <0.001  | 1.59 (1.15 – 2.01)     | <0.001  | 1.18 (0.68 – 1.67)     | <0.001  | 1.18 (0.78 – 1.58)     | <0.001  | 0.51 (0.15 – 0.87)     | 0.006   |
| Three or more                                                                                                                                                                                                                                                                                                                                                                                                           |  | -                             | -       | 3.15 (1.98 – 4.31)     | <0.001  | 0.65 (-0.50 – 1.81)    | 0.267   | 1.78 (1.15 – 2.41)     | <0.001  | 0.97 (0.52 – 1.43)     | <0.001  |
| <sup>a</sup> Patient Health Questionnaire-9 depression score , measured on continuous scale from 0 – 27.<br><sup>b</sup> General Anxiety Disorder-7 anxiety score, measured on a continuous scale from 0 – 21.<br>Model I: Adjust for sex, age, site education, and employment status, marital status.<br>Model II: Adjust for the variables in Model I plus physical activity, BMI, alcohol status, and smoking status |  |                               |         |                        |         |                        |         |                        |         |                        |         |

## S4 Appendix

| <b>S4 Appendix Distribution of sociodemographic characteristics by availability of multimorbidity data</b>                                             |                                          |                                               |                              |
|--------------------------------------------------------------------------------------------------------------------------------------------------------|------------------------------------------|-----------------------------------------------|------------------------------|
| Variable                                                                                                                                               | Sufficient <sup>+</sup> data<br>(n=8754) | Incomplete<br>multimorbidity data<br>(n=1094) | <i>p</i> -value <sup>a</sup> |
|                                                                                                                                                        | n (%)                                    | n (%)                                         |                              |
| Sex                                                                                                                                                    |                                          |                                               | <0.001                       |
| Male                                                                                                                                                   | 3722 (43%)                               | 565 (52%)                                     |                              |
| Female                                                                                                                                                 | 5032 (57%)                               | 530 (48%)                                     |                              |
| Age group (years)                                                                                                                                      |                                          |                                               | <0.001                       |
| 15 – 17                                                                                                                                                | 857 (10%)                                | 285 (26%)                                     |                              |
| 18 – 29                                                                                                                                                | 3332 (38%)                               | 411 (38%)                                     |                              |
| 30 – 39                                                                                                                                                | 1782 (20%)                               | 124 (11%)                                     |                              |
| 40 – 49                                                                                                                                                | 1293 (15%)                               | 90 (8%)                                       |                              |
| 50 – 59                                                                                                                                                | 725 (8%)                                 | 57 (5%)                                       |                              |
| ≥60                                                                                                                                                    | 765 (9%)                                 | 128 (12%)                                     |                              |
| Site                                                                                                                                                   |                                          |                                               | <0.001                       |
| Lilongwe                                                                                                                                               | 1602 (18%)                               | 317 (29%)                                     |                              |
| Karonga                                                                                                                                                | 7152 (82%)                               | 778 (71%)                                     |                              |
| Education attainment                                                                                                                                   |                                          |                                               | <0.001                       |
| Not completed any level                                                                                                                                | 4394 (50%)                               | 630 (58%)                                     |                              |
| Primary                                                                                                                                                | 1441 (17%)                               | 163 (15%)                                     |                              |
| Junior secondary                                                                                                                                       | 1232 (14%)                               | 110 (10%)                                     |                              |
| Senior secondary                                                                                                                                       | 1057 (12%)                               | 118 (11%)                                     |                              |
| Post secondary                                                                                                                                         | 491 (6%)                                 | 48 (4%)                                       |                              |
| Missing                                                                                                                                                | 139 (2%)                                 | 26 (2%)                                       |                              |
| Employment status                                                                                                                                      |                                          |                                               | <0.001                       |
| Not employed                                                                                                                                           | 2385 (27%)                               | 311 (28%)                                     |                              |
| Full-time student                                                                                                                                      | 1161 (13%)                               | 325 (30%)                                     |                              |
| Self or irregular                                                                                                                                      | 4565 (52)                                | 398 (36%)                                     |                              |
| Employed or regular                                                                                                                                    | 643 (7%)                                 | 61 (6%)                                       |                              |
| Depressive symptoms score<br>Mean (SD) <sup>b</sup>                                                                                                    | 1.8 (3.0)                                | 1.7 (2.7)                                     | 0.281                        |
| Anxiety symptoms score<br>Mean (SD) <sup>b</sup>                                                                                                       | 1.4 (2.6)                                | 1.3 (2.5)                                     | 0.467                        |
| SD = standard deviation                                                                                                                                |                                          |                                               |                              |
| <sup>a</sup> <i>p</i> -value from chi-square test unless specified.                                                                                    |                                          |                                               |                              |
| <sup>b</sup> <i>p</i> -value from t-test                                                                                                               |                                          |                                               |                              |
| <sup>+</sup> Sufficient data if self-reported or measured with two or more conditions, irrespective of whether missing data on one or more conditions. |                                          |                                               |                              |

## S5 Appendix

| <b>S5 Appendix Sensitivity analysis of the association between number of physical health conditions and depression and anxiety scores, excluding those with missing data on one condition despite having data on the other conditions</b> |                          |                               |         |                        |         |                        |         |
|-------------------------------------------------------------------------------------------------------------------------------------------------------------------------------------------------------------------------------------------|--------------------------|-------------------------------|---------|------------------------|---------|------------------------|---------|
|                                                                                                                                                                                                                                           |                          | Depression score <sup>a</sup> |         |                        |         |                        |         |
|                                                                                                                                                                                                                                           |                          | Unadjusted Model              |         | Model I                |         | Model II               |         |
| Number of physical conditions                                                                                                                                                                                                             |                          | B coefficient (95% CI)        | P-value | B coefficient (95% CI) | P-value | B coefficient (95% CI) | P-value |
|                                                                                                                                                                                                                                           | None                     | Ref.                          |         | Ref.                   |         | Ref.                   |         |
|                                                                                                                                                                                                                                           | One                      | 0.57 (0.39 – 0.74)            | <0.001  | 0.73 (0.55 – 0.90)     | <0.001  | 0.74 (0.56 – 0.91)     | <0.001  |
|                                                                                                                                                                                                                                           | Two                      | 1.13 (0.88 – 1.38)            | <0.001  | 1.44 (1.18 – 1.71)     | <0.001  | 1.47 (1.21 – 1.74)     | <0.001  |
|                                                                                                                                                                                                                                           | Three or more            | 1.53 (1.13 – 1.92)            | <0.001  | 2.08 (1.67 – 2.50)     | <0.001  | 2.19 (1.76 – 2.61)     | <0.001  |
|                                                                                                                                                                                                                                           | <i>p</i> value for trend | <0.001                        |         | <0.001                 |         | <0.001                 |         |
|                                                                                                                                                                                                                                           |                          | Anxiety score <sup>b</sup>    |         |                        |         |                        |         |
| Number of physical conditions                                                                                                                                                                                                             |                          |                               |         |                        |         |                        |         |
|                                                                                                                                                                                                                                           | None                     | Ref.                          |         | Ref.                   |         | Ref.                   |         |
|                                                                                                                                                                                                                                           | One                      | 0.57 (0.43 – 0.70)            | <0.001  | 0.61 (0.46 – 0.77)     | <0.001  | 0.62 (0.46 – 0.77)     | <0.001  |
|                                                                                                                                                                                                                                           | Two                      | 0.89 (0.71 – 1.07)            | <0.001  | 1.14 (0.91 – 1.37)     | <0.001  | 1.17 (0.93 – 1.40)     | <0.001  |
|                                                                                                                                                                                                                                           | Three or more            | 1.04 (0.74 – 1.33)            | <0.001  | 1.58 (1.22 – 1.95)     | <0.001  | 1.65 (1.28 – 2.03)     | <0.001  |
|                                                                                                                                                                                                                                           | <i>p</i> value for trend | <0.001                        |         | <0.001                 |         | <0.001                 |         |

<sup>a</sup> Patient Health Questionnaire-9 depression score , measured on continuous scale from 0 – 27.  
<sup>b</sup> General Anxiety Disorder-7 anxiety score, measured on a continuous scale from 0 – 21.  
 Model I: Adjust for sex, age, site education, and employment status, marital status.  
 Model II: Adjust for the variables in Model I plus physical activity, BMI, alcohol status, and smoking status



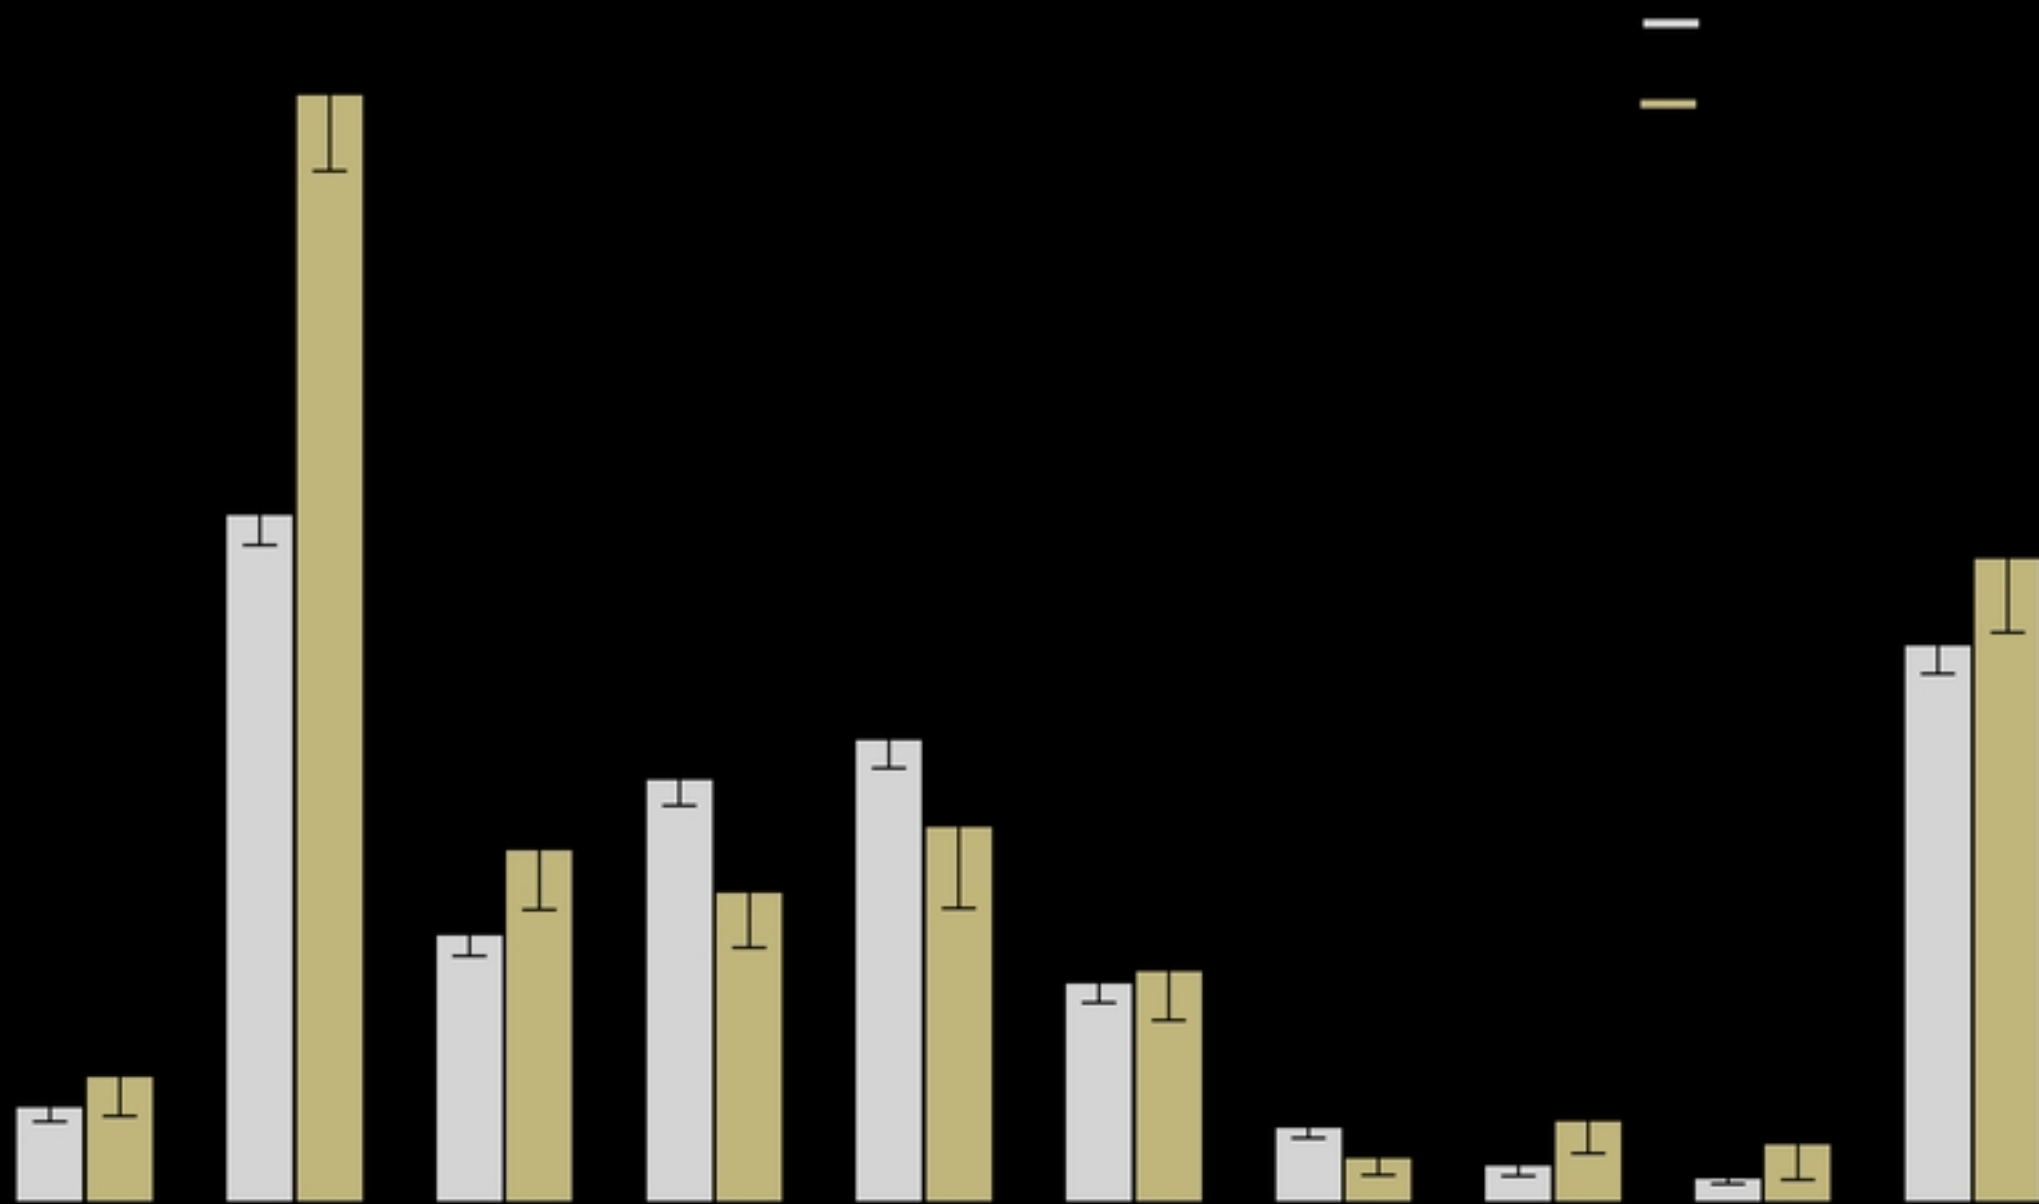

Figure 1

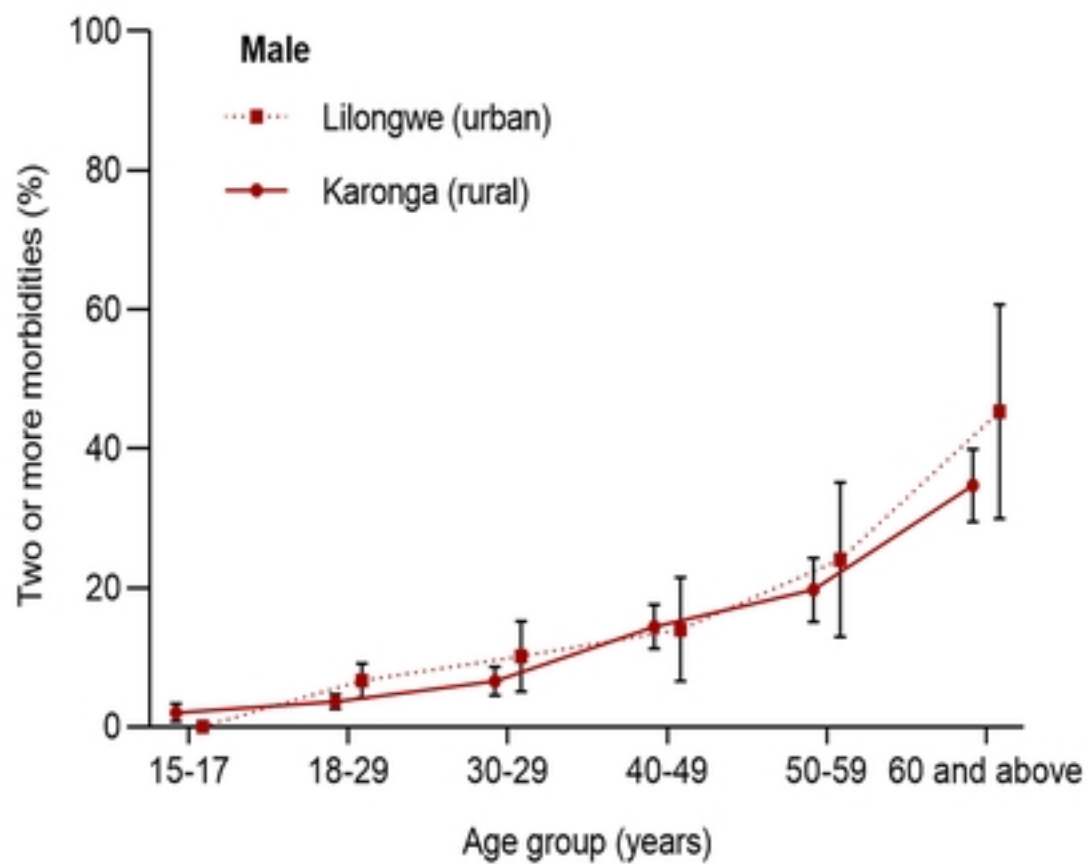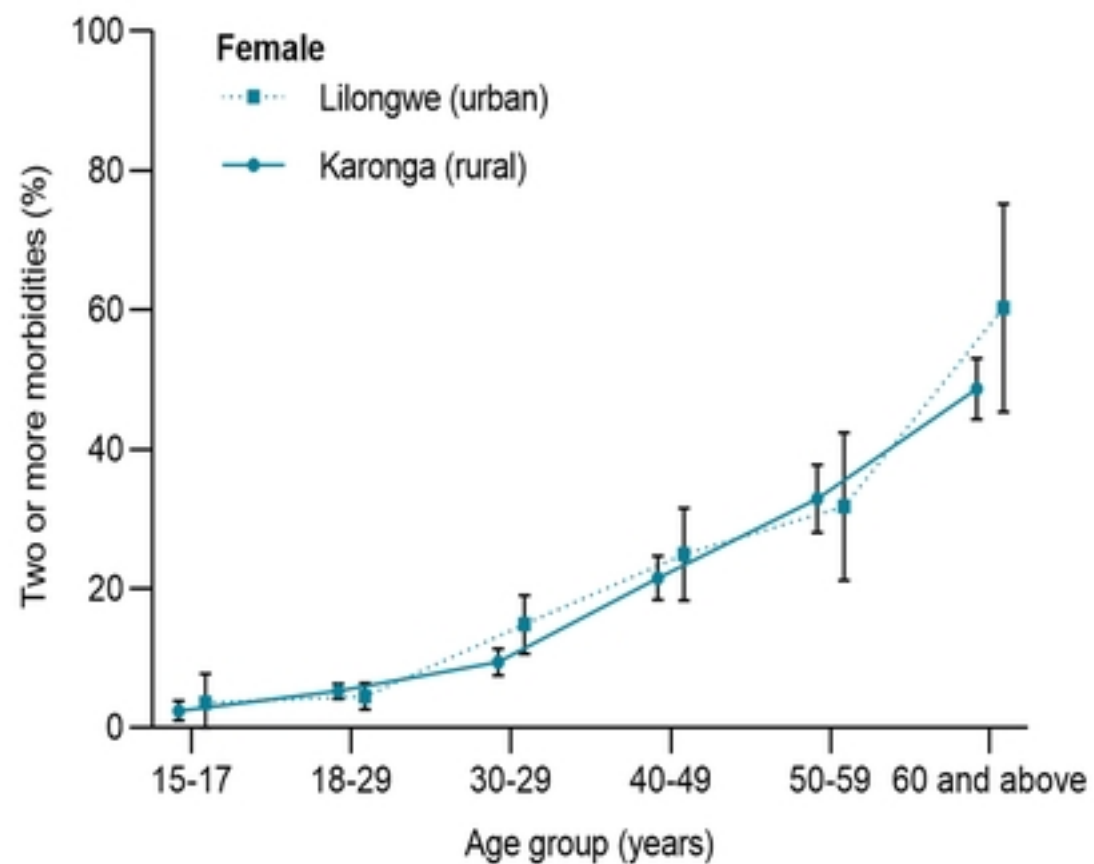

Figure 2
